# Supplementary material
Source: MDPI journal article supplement (https://www.mdpi.com/1999-4907/13/8/1240)
Supplement: s1 [file s1]

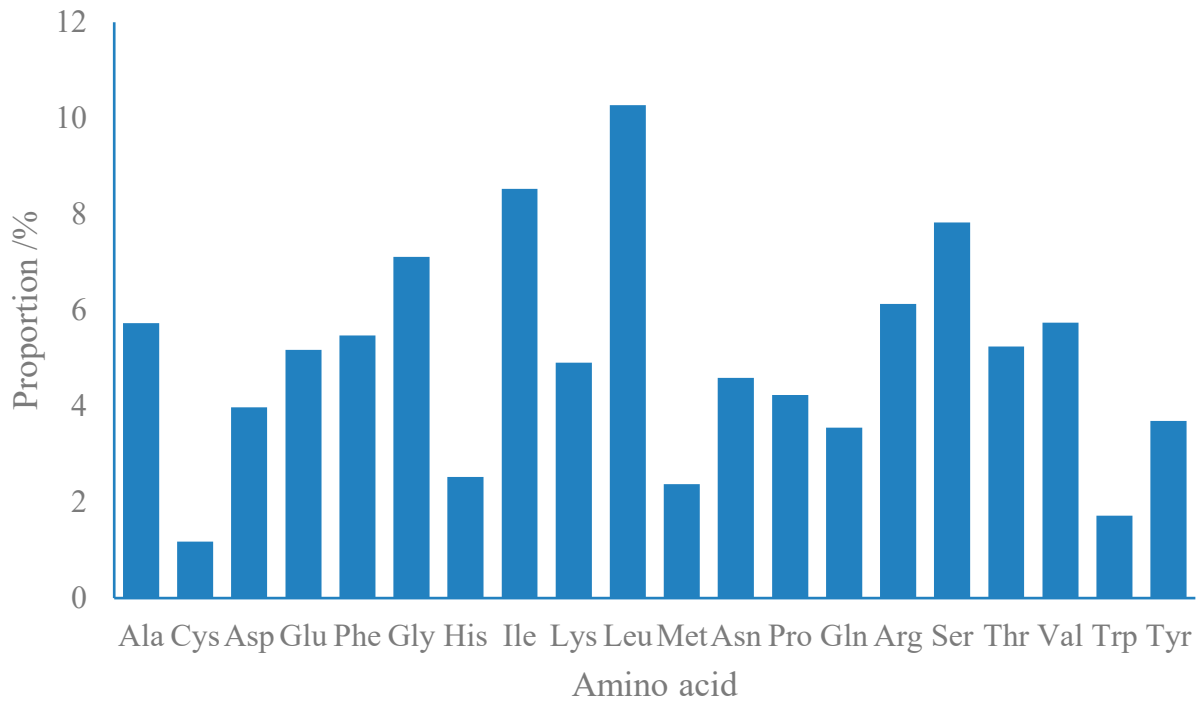

Figure S1. Amino acids frequencies in the *D. grandiflora* chloroplast genome protein-coding sequences.

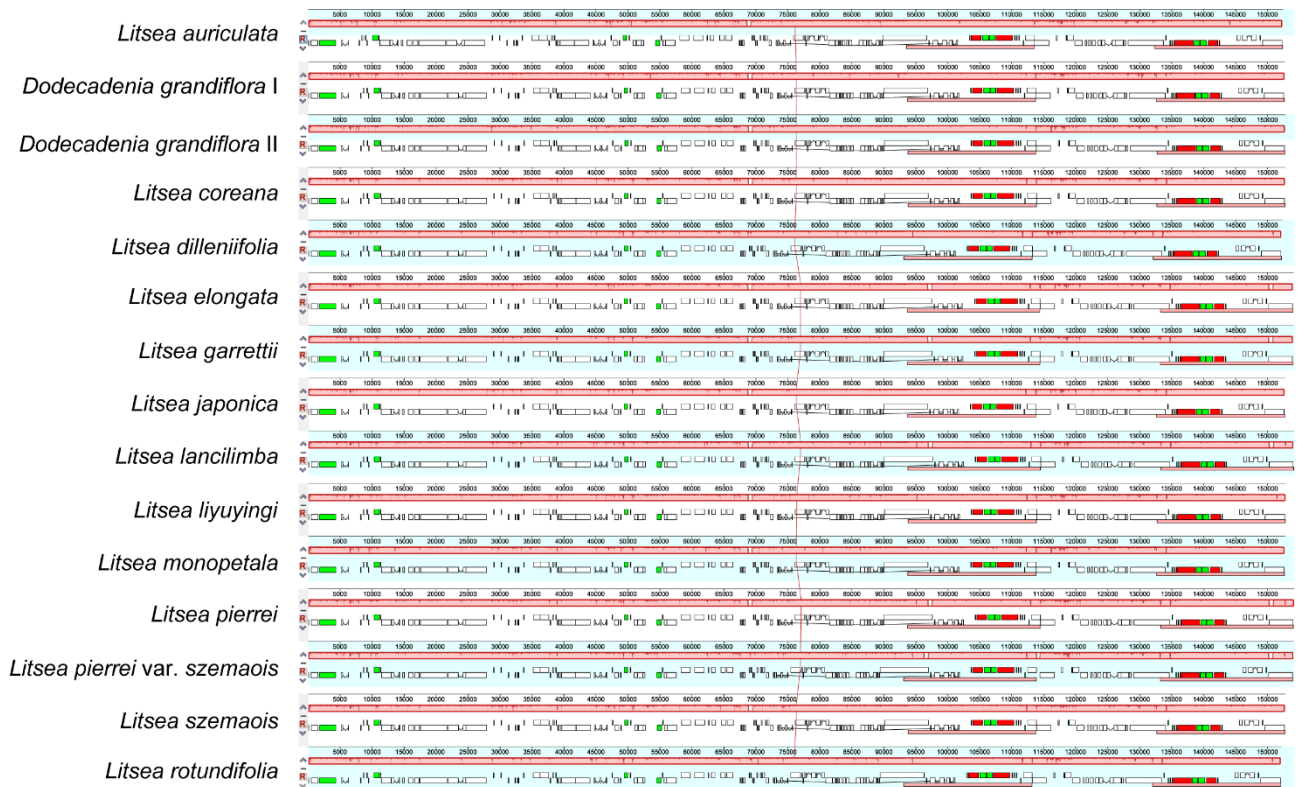

Figure S2 Mauve alignment of *D. grandiflora* and 13 *Litsea* cp genome revealing no interspecific rearrangements

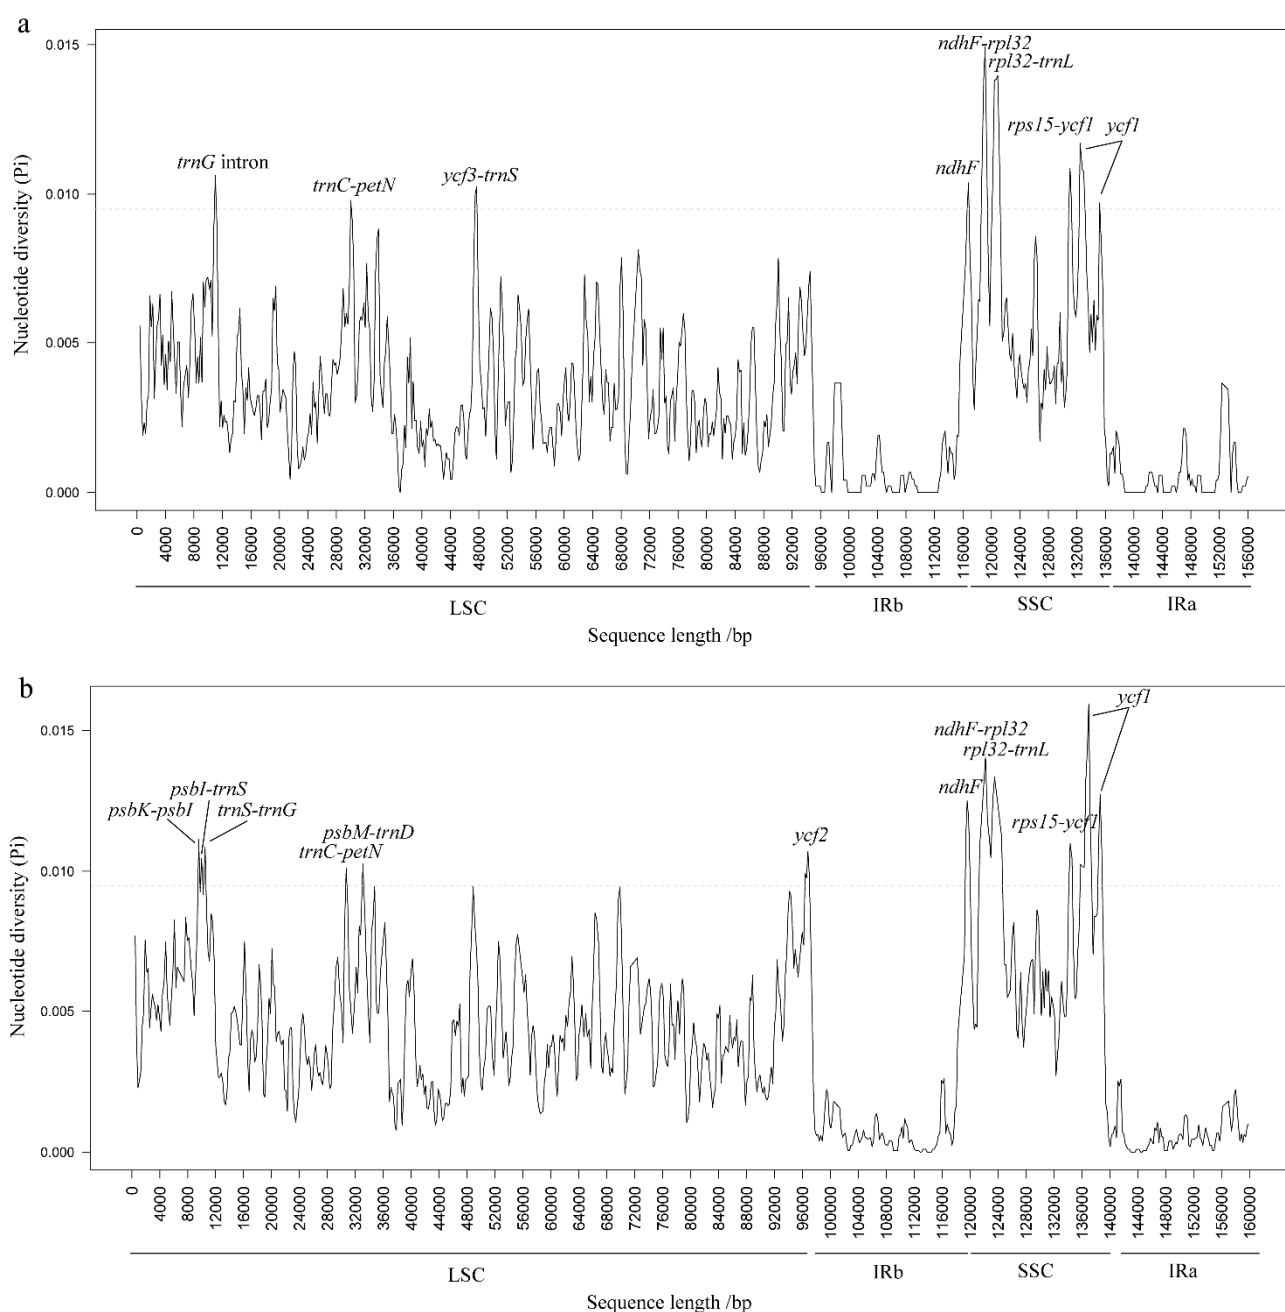

Figure S3 Comparison of Pi values, (a) among *D. grandiflora* and 13 *Litsea* plastomes, and (b) among 68 plastomes of the *Litsea* complex.
